# Supplementary material
Source: publisher site journal article supplement (https://www.dovepress.com/article/supplementary_file/610843/610843%20Revised%20Supplementary%20Material.docx)

**Supplementary materials**

***Preoperative Stellate Ganglion Block for Postoperative Sore Throat in Patients undergoing Double-Lumen Endotracheal Intubation: A Randomized Clinical Trial***

*Peilin Cong1#, Yawen Tan2#, Huiying Li2, He Zhang2, Le Zhang2, Yuelong Jin3, Lei Shan4, Yunpeng Zhao4, Yanwu Jin5, Qianqian Wu1,*

*Zheping Chen1*, Ning Li2**

**Supplementary Table 1****. Grading system for severity of POST and hoarseness**

| **Grades** | **Severity of POST** | **Severity of hoarseness** |
| --- | --- | --- |
| None | No sore throat | No hoarseness |
| Mild | Pain with deglutition | Noticed by patient |
| Moderate | Pain constantly present and increasing with deglutition | Obvious to observer |
| Severe | Pain interfering with eating and requiring analgesic medication | Aphonia |

***Abbreviation:*** POST, postoperative sore throat

**Supplementary Figure 1. Intraoperative hemodynamic parameters. (A) SBP; (B) DBP; and (C) HR.**

T0, pre-induction (baseline); T1, post-induction pre-DLT intubation; T2, immediately post-DLT intubation; T3, 5 min post-DLT intubation; T4, 5 min pre-DLT extubation; T5, immediately post-DLT extubation; T6, 5 min post-DLT extubation.

***Abbreviation:*** SGB, stellate ganglion block; DLT, double-lumen endobronchial tube.


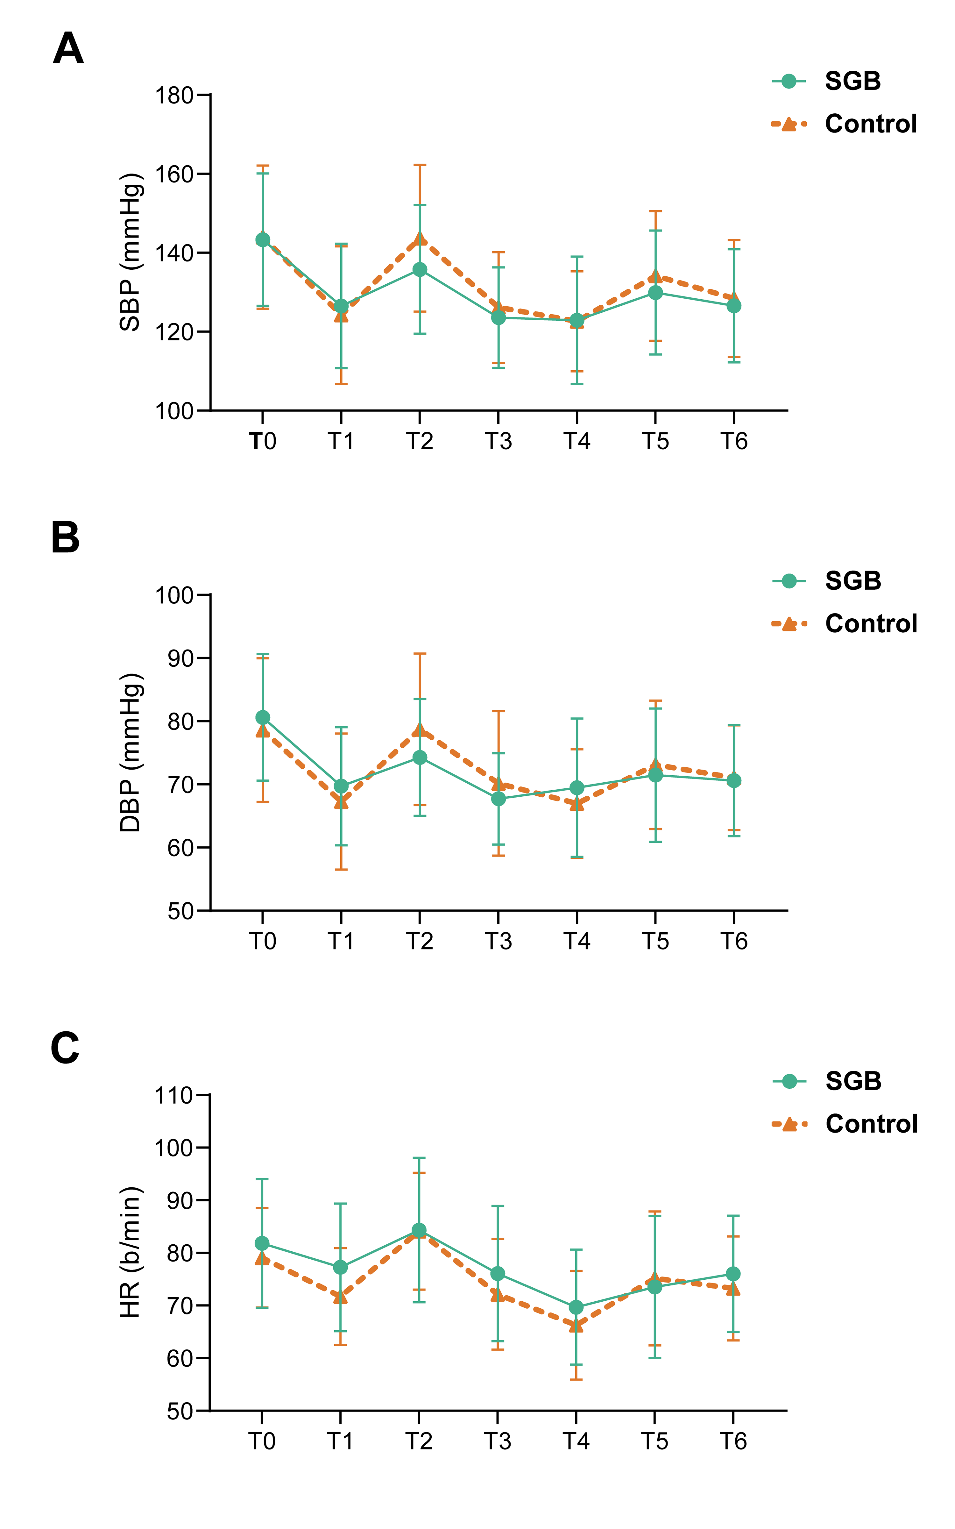

Supplement: Supplementary file 1 [file 610843%20Revised%20Supplementary%20Material.docx]
